# Supplementary material for: Observation of bending, cracking and jumping phenomena on cooling and heating of tetrahydrate berberine chloride crystals
Source: Royal Society of Chemistry journal article supplement (doi:10.1039/c8ce00114f), 2018-01-01
Supplement: c8ce00114f1.pdf [file c8ce00114f1.pdf]

## Electronic Supporting Information (ESI)

### Observation of bending, cracking and jumping phenomena on cooling and heating of Tetrahydrate Berberine Chloride crystals

Manjeet Singh,<sup>[a]</sup> Subhrajyoti Bhandary,<sup>[a]</sup> Rohit Bhowal,<sup>[a]</sup> and Deepak Chopra\*<sup>[a]</sup>

[a] Crystallography Crystal Chemistry Laboratory, Department of Chemistry, Indian Institute of Science Education and Research Bhopal, Bhopal By-Pass Road Bhauri, Bhopal-462066, Madhya Pradesh, India. Email: dchopra@iiserb.ac.in

#### Experimental Methods:

##### Crystallizations of tetrahydrated and dihydrated berberine chloride

Berberine chloride was purchased from Sigma-Aldrich Company and has been used without further purification. The single crystals of the tetrahydrated phase (BL-4H<sub>2</sub>O) were obtained during the mechanical and liquid-assisted grinding of berberine chloride with the additive pyrene (was purchased from Sigma-Aldrich Company) by taking 1:1 stoichiometric ratio of BL (32.3 mg, 0.087 mmol) and PY (17.7 mg, 0.087 mmol), using an agate mortar and pestle. Methanol was used as a solvent for grinding. The initial mixture was grinded for ~ 15 minutes without any solvent. Then grinding was carried out for ~ 30 minutes with the drop-wise addition of solvent, at an interval of 15 minutes each.<sup>1</sup> The resulting powder was air dried and crystallized using various solvents of HPLC grade in 5.0 ml beakers and then kept for crystallization at room temperature (25°C). The slow evaporation of Berberine chloride from acetonitrile solvent at room temperature results in the formation of single crystals of the dihydrated phase (BL-2H<sub>2</sub>O). These obtained crystals were then characterized structurally using SCXRD and then these crystals were further used for the purpose of investigation of the phase transition and all other related characterizations.

### **Single Crystal X-ray Diffraction (SCXRD)**

The single crystal X-ray diffraction measurements for BL-4H<sub>2</sub>O and BL-2H<sub>2</sub>O crystal were carried out on a Bruker APEX II Kappa CCD and D8 Venture diffractometer equipped with a graphite monochromator using MoK $\alpha$  radiation ( $\lambda = 0.71073 \text{ \AA}$ ) at 100(2) K and 110 K respectively. Unit cell measurement, data collection, integration, scaling and absorption corrections was performed using Bruker APEX II software.<sup>2</sup> Multiscan absorption corrections were applied using SADABS.<sup>3</sup> The structures were solved by direct methods using SHELXS-97<sup>4</sup> and refined with Full-matrix least squares method using SHELXL-2014<sup>5</sup> present in the program suite WinGX.<sup>6</sup> All non-hydrogen atoms were refined anisotropically, and all hydrogen atoms bound to carbon were placed in the calculated positions using a riding model and all hydrogen atoms bound to oxygen (water) were located from the difference fourier map. All O-H distances for water molecules were fixed to their targeted position. Geometrical calculations were done using PARST<sup>7</sup> and PLATON.<sup>8</sup> The packing diagrams of the molecules were generated using Mercury 3.6 software.<sup>9</sup>

### **Differential Scanning Calorimetry (DSC) and Thermogravimetric analysis (TGA)**

The DSC traces of BL-4H<sub>2</sub>O crystal was recorded by using a Perkin-Elmer DSC 6000 instrument under nitrogen gas atmosphere. A sample of precisely weighed about 1.0 to 2.0 mg was placed in non-hermetic sealed aluminium pan in vacuum. The samples were scanned at a rate of 5 °C/min in the range of 30–0°C and 0°C–300 °C under a dry nitrogen atmosphere at a flow rate of 20 ml/min. Thermogravimetric analysis was performed under a mixture of dry air and nitrogen. The amount of material used in TGA ranged from approximately 3.0 mg to 5.0 mg. The temperature was typically increased at a heating rate of 10 °C/min.

## Variable Temperature Powder X-Ray Diffraction (VT-PXRD)

The variable temperature powder X-ray diffraction patterns of BL-4H<sub>2</sub>O crystals were recorded on a PANalytical Empyrean X-ray diffractometer with CuK $\alpha$  radiation (1.5418 Å). The crystals of BL-4H<sub>2</sub>O were placed on a silica sample holder and measured by a continuous scan between 5 to 50° in 2 $\theta$  with a step size of 0.013103°. Two sets of experiments were performed. In the first one, the sample was cooled from 25 to 15 °C at a cooling rate of 1 °C/min. In the second set, the sample was heated from 10 to 45 °C at a heating rate of 1 °C/min.

## Hot Stage Microscopy (HSM)

Hot Stage Microscopic (HSM) experiments were performed on a stereomicroscope equipped with a cool stage apparatus (operating at a cooling rate of 1 and 2°C/min with lnp 10) as well as hot stage apparatus (operating at a heating rate of 1 and 2°C/min), and the photographs were taken with a Leica polarizing microscope. The single crystal was placed on a glass slide and the images of the performed experiments were recorded.

**Table S1.** SCXRD Data of BL-4H<sub>2</sub>O and BL-2H<sub>2</sub>O phases on freshly grown crystals.

|                     | <b>BL-4H<sub>2</sub>O</b>                                                                       | <b>BL-2H<sub>2</sub>O</b>                                                                       |
|---------------------|-------------------------------------------------------------------------------------------------|-------------------------------------------------------------------------------------------------|
| Temperature         | 100 K                                                                                           | 110 K                                                                                           |
| Crystal system      | Triclinic                                                                                       | Monoclinic                                                                                      |
| Space group         | <i>P</i> -1                                                                                     | <i>C</i> 2/ <i>c</i>                                                                            |
| M. F.               | C <sub>20</sub> H <sub>18</sub> NO <sub>4</sub> <sup>+</sup> Cl <sup>-</sup> ·4H <sub>2</sub> O | C <sub>20</sub> H <sub>18</sub> NO <sub>4</sub> <sup>+</sup> Cl <sup>-</sup> ·2H <sub>2</sub> O |
| M. Wt.              | 443.87                                                                                          | 407.83                                                                                          |
| CCDC                | 1565650                                                                                         | 1811915                                                                                         |
| a (Å)               | 6.891(4)                                                                                        | 27.449 (7)                                                                                      |
| b (Å)               | 11.479(6)                                                                                       | 7.0744 (17)                                                                                     |
| c (Å)               | 13.142(7)                                                                                       | 21.677(6)                                                                                       |
| $\alpha$            | 76.205(4)                                                                                       | 90                                                                                              |
| $\beta$             | 89.221(4)                                                                                       | 117.695 (7)                                                                                     |
| $\gamma$            | 85.231(4)                                                                                       | 90                                                                                              |
| V (Å <sup>3</sup> ) | 1006.0(10)                                                                                      | 3727.1 (16)                                                                                     |

|                                                                 |                              |                              |
|-----------------------------------------------------------------|------------------------------|------------------------------|
| Z                                                               | 2                            | 8                            |
| $D_{\text{cal}}(\text{Mgm}^{-3})$                               | 1.111                        | 1.454                        |
| $\mu (\text{mm}^{-1})$                                          | 0.239                        | 0.244                        |
| F (000)                                                         | 468                          | 1712                         |
| $\theta$ (min, max)                                             | 1.83, 25.06                  | 2.99, 24.99                  |
| $h_{\text{min, max}}, k_{\text{min, max}}, l_{\text{min, max}}$ | (-8, 8), (-13,13), (-15, 15) | (-32, 30), (-8,8), (-20, 25) |
| No. of ref.                                                     | 13968                        | 13186                        |
| No. of unique ref./obs. Ref.                                    | 3562, 2267                   | 3291, 1742                   |
| No. parameters                                                  | 349                          | 265                          |
| R all, R obs                                                    | 0.1034, 0.0578               | 0.1602, 0.0668               |
| wR2 all, wR2 obs                                                | 0.1735, 0.1403               | 0.1273, 0.1078               |
| $\Delta\rho_{\text{min, max}} (\text{e}\text{\AA}^{-3})$        | -0.368, 0.484                | -0.375, 0.356                |
| G.o.F                                                           | 1.021                        | 1.023                        |

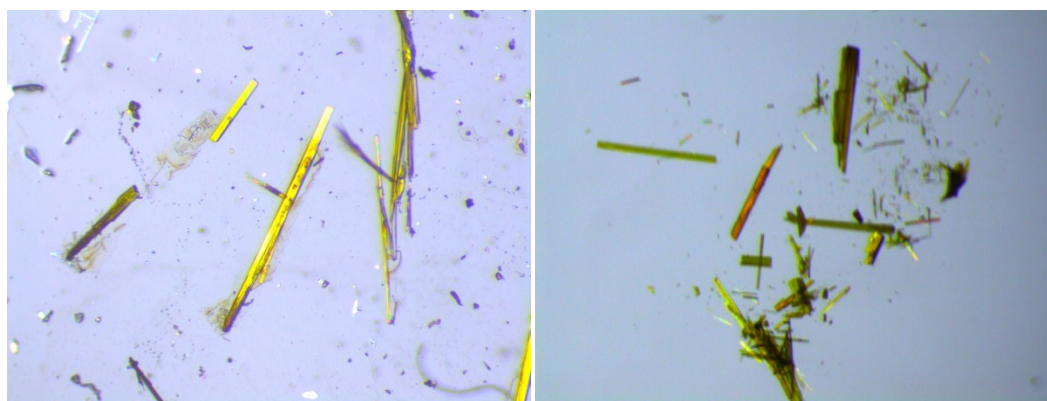

**Fig. S1** Photographs of BL-4H<sub>2</sub>O crystals

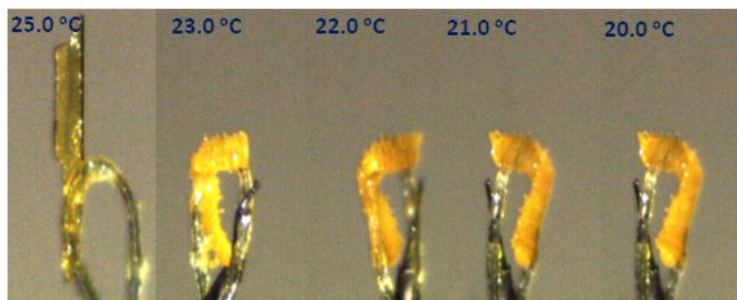

**Fig. S2** Snapshots of BL-4H<sub>2</sub>O crystal during the cooling from 25 to 20 °C at the rate of 1 °C/min on the X-Ray diffractometer.

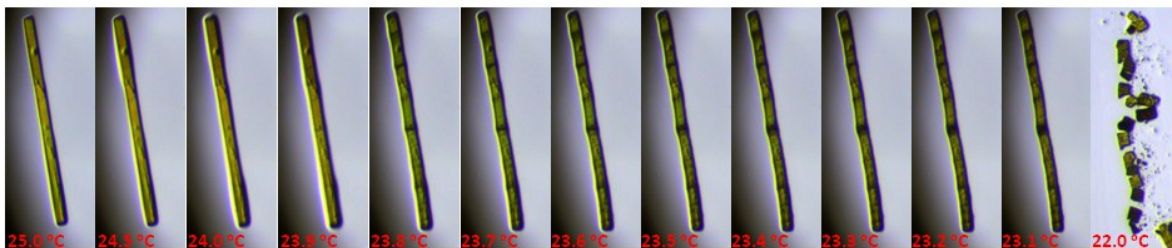

**Fig. S3** HSM snapshots at 1 °C/min cooling rate of BL-4H<sub>2</sub>O crystal from 25 to 20 °C.

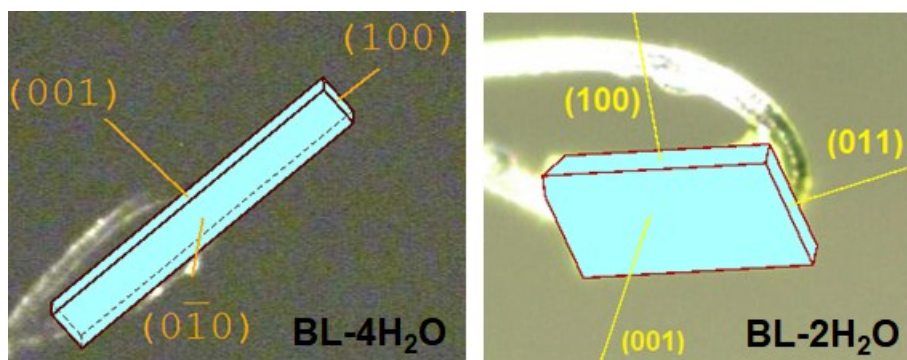

**Fig. S4** Experimental face indexing of BL-4H<sub>2</sub>O and BL-2H<sub>2</sub>O crystalin SCXRD.

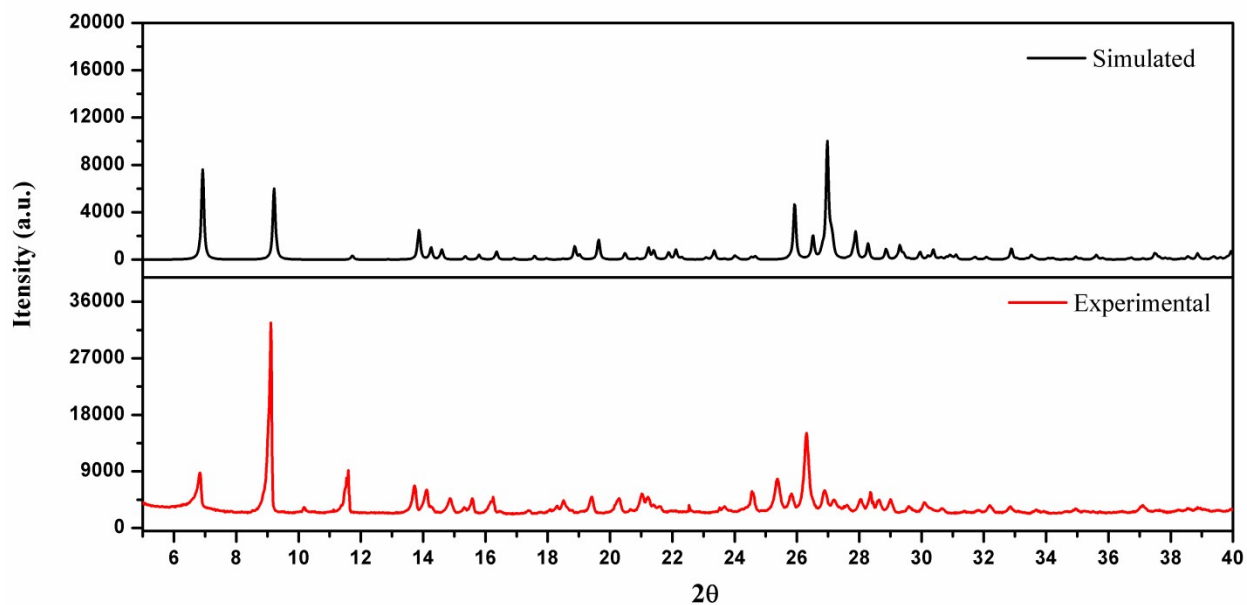

**Fig. S5** Experimental and simulated PXR D pattern of BL-4H<sub>2</sub>O powdered crystals at room temperature.

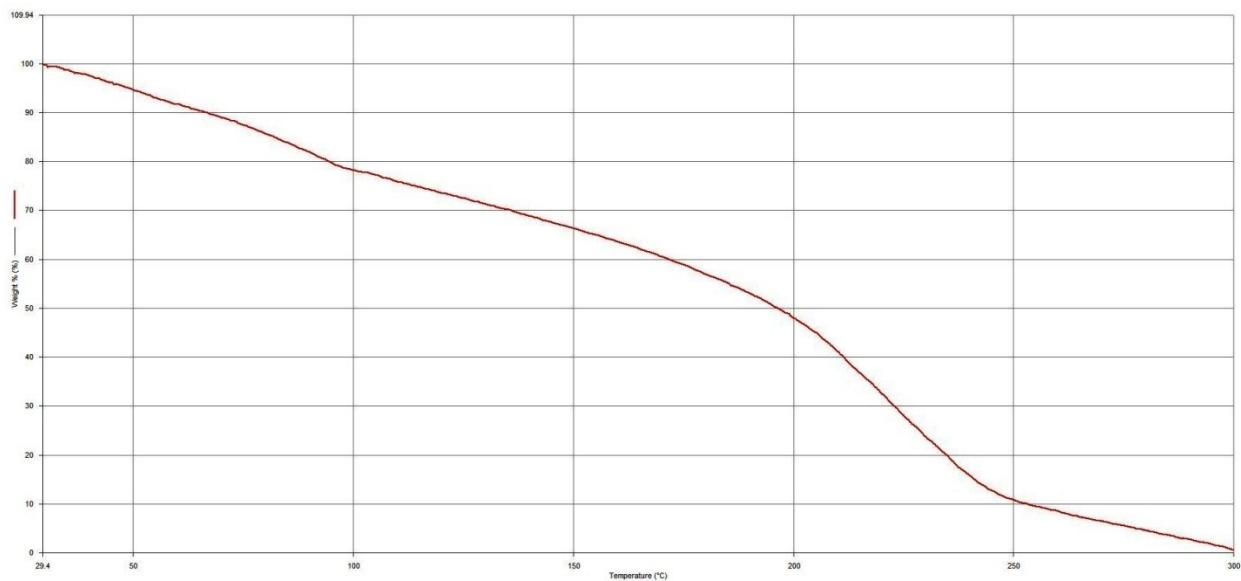

**Fig. S6** TGA plot of BL-4H<sub>2</sub>O crystals at the rate of 10 °C/min.

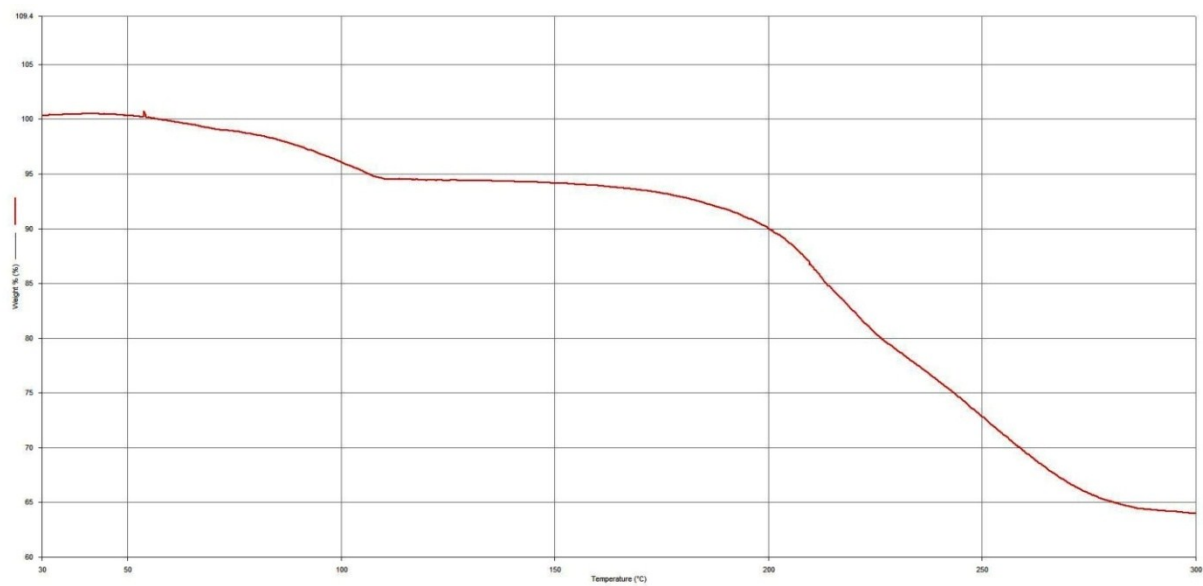

**Fig. S7** TGA plot of BL-2H<sub>2</sub>O crystals (recovered sample after VT-PXRD) at the rate of 10 °C/min.

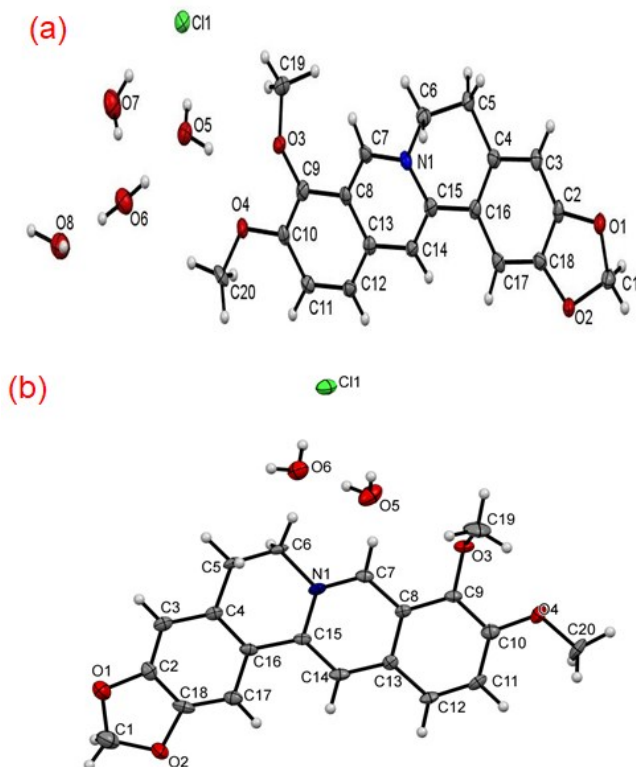

**Fig. S8** ORTEP representations of the asymmetric unit (50% ellipsoidal probability) for (a) BL-4H<sub>2</sub>O and (b) BL-2H<sub>2</sub>O with atom numbering scheme.

**Table S2.** List of intermolecular interactions in Berberine Chloride tetrahydrate (BL-4H<sub>2</sub>O).

| Interactions              | Symmetry | Geometry  |           |             |
|---------------------------|----------|-----------|-----------|-------------|
|                           |          | D...A (Å) | H...A (Å) | D-H...A (°) |
| C20-H20A...O6             | x, y, z  | 3.568     | 2.584     | 151         |
| O5-H5C...O3               |          | 3.069     | 2.206     | 153         |
| O5-H5C...O4               |          | 3.016     | 2.347     | 128         |
| O5-H5D...Cl1 <sup>-</sup> |          | 3.151     | 2.225     | 169         |
| O6-H6C...O5               |          | 2.774     | 1.850     | 168         |
| O6-H6D...O8               |          | 2.752     | 1.822     | 171         |
| O7-H7A...Cl1 <sup>-</sup> |          | 3.055     | 2.144     | 163         |
| O7-H7B...O6               |          | 2.738     | 1.804     | 174         |

|                             |                |       |       |     |
|-----------------------------|----------------|-------|-------|-----|
| C11–H11...O8                | -x, -y+1, -z   | 3.359 | 2.380 | 150 |
| C3–H3...O6                  | x, +y-1, +z+1  | 3.365 | 2.516 | 135 |
| C5–H5A...O7                 |                | 3.630 | 2.751 | 138 |
| C19–H19A...O3               | -x, -y+1, -z+1 | 3.459 | 2.608 | 135 |
| C7–H7...O5                  |                | 3.273 | 2.273 | 153 |
| C6–H6B...O5                 |                | 3.342 | 2.478 | 136 |
| C5–H5B...O7                 | -x+1,-y+1,-z+1 | 3.842 | 2.892 | 147 |
| C19–H19B...Cl1 <sup>-</sup> |                | 3.831 | 2.774 | 166 |
| C19–H19A...O2               | x,+y+1,+z      | 3.263 | 2.705 | 112 |
| C20–H20B...O1               | -x+1,-y,-z+1   | 3.491 | 2.733 | 127 |
| C1–H1A...O4                 |                | 3.553 | 2.808 | 126 |
| C19–H19C...O2               |                | 3.518 | 2.477 | 162 |
| C12–H12...Cl1 <sup>-</sup>  | x,+y-1,+z      | 3.712 | 2.774 | 145 |
| C14–H14...Cl1 <sup>-</sup>  |                | 3.526 | 2.509 | 157 |
| O5–H5C...O2                 | -x,-y,-z+1     | 3.206 | 2.754 | 111 |
| C1–H1B...O5                 |                | 3.374 | 2.669 | 122 |
| O8–H8B...O7                 | -x,-y+2,-z     | 2.809 | 1.891 | 165 |
| O8–H8A...O7                 | x-1,+y,+z      | 2.797 | 1.869 | 170 |

**Table S3.** List of intermolecular interactions in Berberine Chloride dihydrate (BL-2H<sub>2</sub>O).

| Interactions              | Symmetry            | Geometry  |           |               |
|---------------------------|---------------------|-----------|-----------|---------------|
|                           |                     | D...A (Å) | H...A (Å) | D–H...A (deg) |
| C19–H19C...O4             | x, y, z             | 3.155     | 2.610     | 111           |
| O5–H5C...O6               |                     | 2.763     | 1.832     | 172           |
| O6–H6C...Cl1 <sup>-</sup> |                     | 3.170     | 2.253     | 165           |
| C1–H1B...O3               | x-1/2,-y+1/2,+z-1/2 | 3.721     | 2.874     | 135           |
| C1–H1A...O5               |                     | 3.440     | 2.580     | 136           |
| C17–H17...O5              |                     | 3.414     | 2.342     | 172           |



|                            |                        |       |       |     |
|----------------------------|------------------------|-------|-------|-----|
| C1–H1B...O4                |                        | 3.505 | 2.845 | 119 |
| C20–H20C...O1              | $-x+1/2+1,-y+1/2,-z+1$ | 3.468 | 2.754 | 123 |
| C12–H12...O6               |                        | 3.590 | 2.573 | 157 |
| C14–H14...O5               |                        | 3.624 | 2.612 | 156 |
| C3–H3...O1                 | $-x+1,-y,-z+1$         | 3.466 | 2.511 | 147 |
| C19–H19B...O5              |                        | 3.665 | 2.669 | 153 |
| C6–H6B...Cl1 <sup>-</sup>  |                        | 3.820 | 2.792 | 159 |
| C6–H6B...O6                | $x,+y-1,+z$            | 3.410 | 2.825 | 114 |
| O5–H5D... Cl1 <sup>-</sup> |                        | 3.287 | 2.370 | 165 |
| C7–H7... Cl1 <sup>-</sup>  |                        | 3.740 | 2.829 | 161 |
| C6–H6B...O6                | $-x+1/2+1,+y-1/2,-$    | 3.470 | 2.737 | 125 |
| O6–H6D... Cl1 <sup>-</sup> | $z+1/2+1$              | 3.184 | 2.251 | 173 |
| C12–H12...Cl1 <sup>-</sup> | $x,-y+1,+z-1/2$        | 3.695 | 2.909 | 130 |
| C19–H19A...O4              | $-x+2,+y,-z+1/2+1$     | 3.576 | 2.589 | 152 |
| C19–H19C...O2              | $-x+1/2+1,-y-1/2,-z+1$ | 3.616 | 2.681 | 145 |

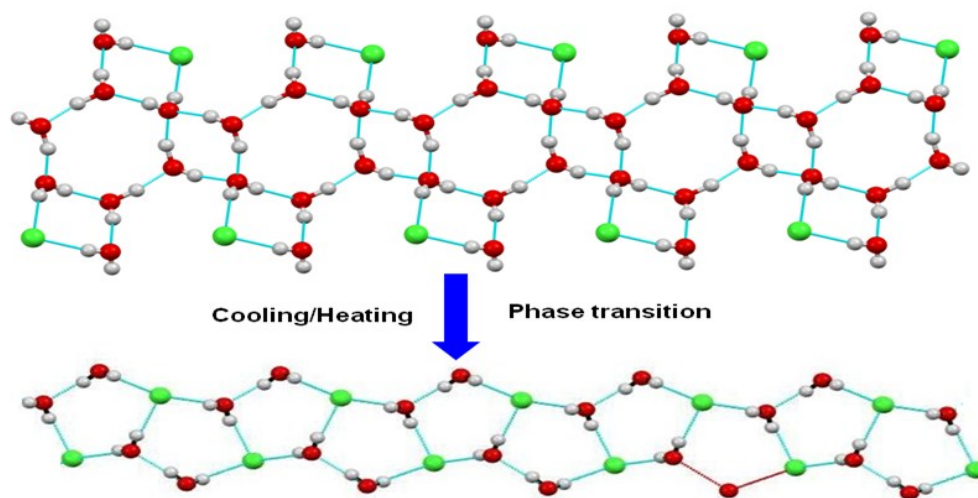

**Fig. S9** Rearrangement of fused six and four-membered rings formed by water and chloride ions in BL-4H<sub>2</sub>O to fused five-membered rings in BL-2H<sub>2</sub>O crystal.

**Table S4.** Comparisons of unit cell axes of both the forms of berberine chloride crystal

| Axes | BL-4H <sub>2</sub> O | BL-2H <sub>2</sub> O                                        |
|------|----------------------|-------------------------------------------------------------|
| a    | 6.8909               | (b) <sup>#</sup> 7.0935 = <b>a<sub>1</sub></b>              |
| b    | 11.4787              | (a) <sup>#</sup> 21.6763/2 = 10.8382 = <b>b<sub>1</sub></b> |
| c    | 13.1419              | (c) <sup>#</sup> 27.5030/2 = 13.7515 = <b>c<sub>1</sub></b> |

<sup>#</sup>: Unit cell representation in the dihydrate

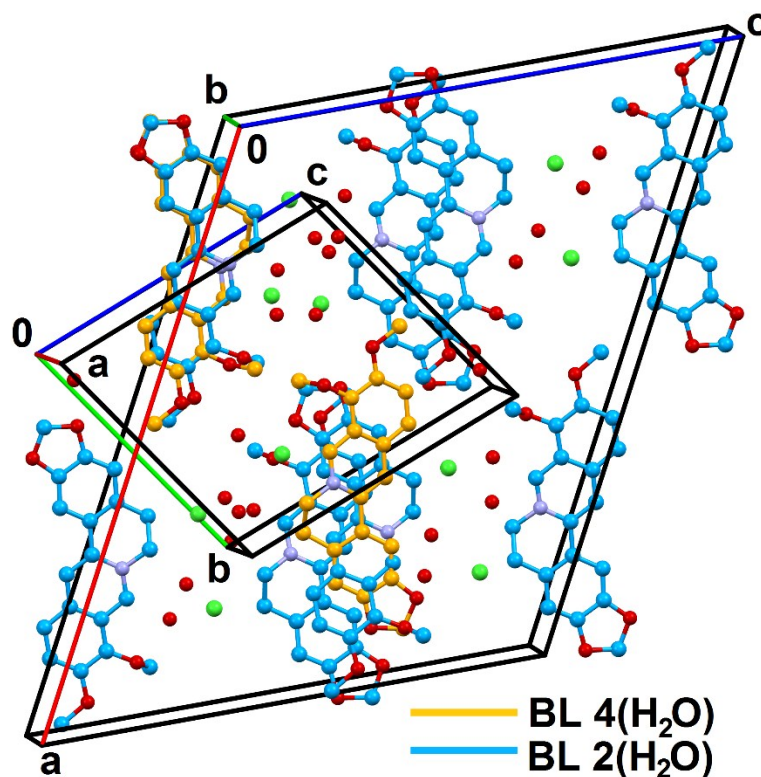

**Fig. S10** Overlay of unit cells for the tetrahydrate (triclinic, smaller) and dihydrate (monoclinic, larger) phases showing the interchange of a and b axes preserving the similar c axis with the anisotropic change of cell parameters as indicated in the Table S4.

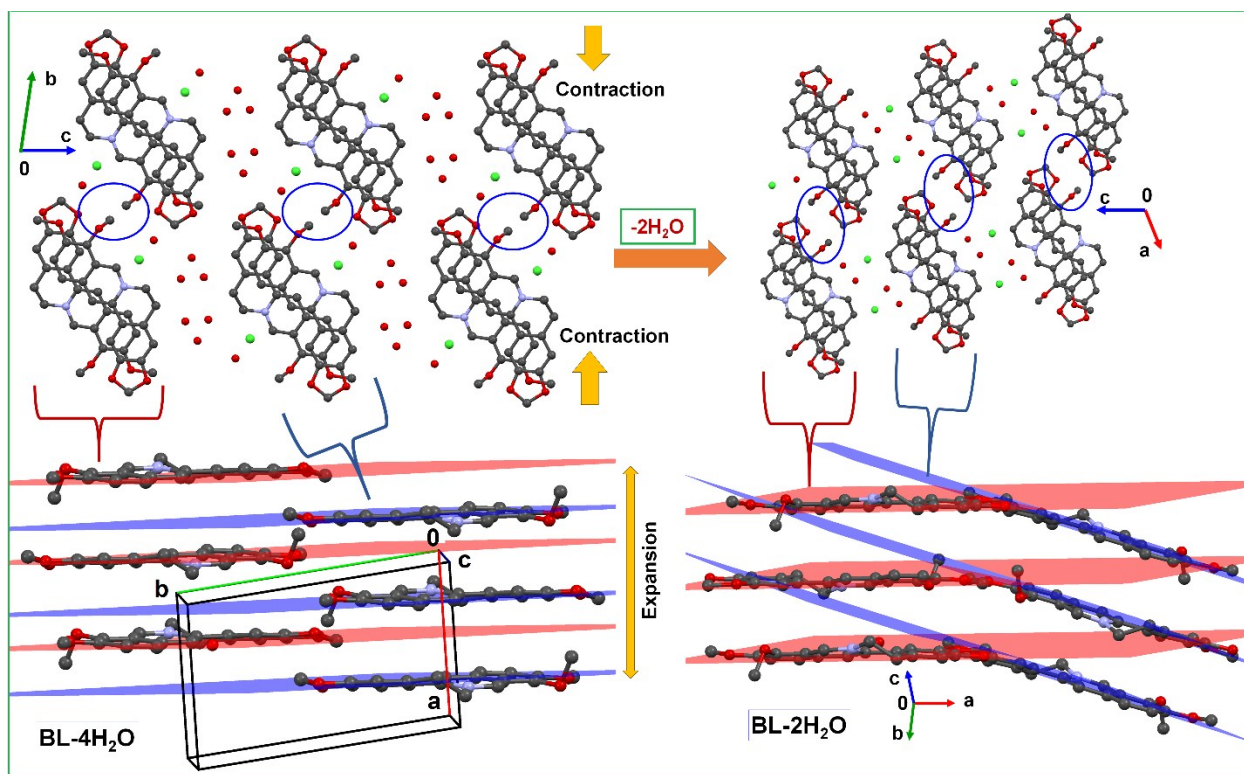

**Fig. S11** Structural transformation from BL-4H<sub>2</sub>O (left) to BL-2H<sub>2</sub>O (right) showing contraction (see yellow arrows) and movements of layers (see the relative positions of –OMe groups in blue circles). Two such adjacent layers are simultaneously expanded in stacking direction with the reorientation of BL molecules to (see red and blue shading) during the process of conversion.

### Energy framework calculations

The energy framework analysis (Reference number 19 in the main manuscript) has been performed using *CrystalExplorer17*<sup>10</sup> to visualize the intermolecular interaction topology in BL-4H<sub>2</sub>O and BL-2H<sub>2</sub>O phases. The pairwise intermolecular interaction energies are computed using an approach described in (Reference number 19 in the main manuscript). The energies are estimated from B3LYP/6-31G(d,p) molecular wave functions calculated at the crystal geometry, summing up the electrostatic, polarization, dispersion and exchange-repulsion terms based on a scaling scheme. The energy cut-off and tube size are 5 kJ/mol and 80 respectively.

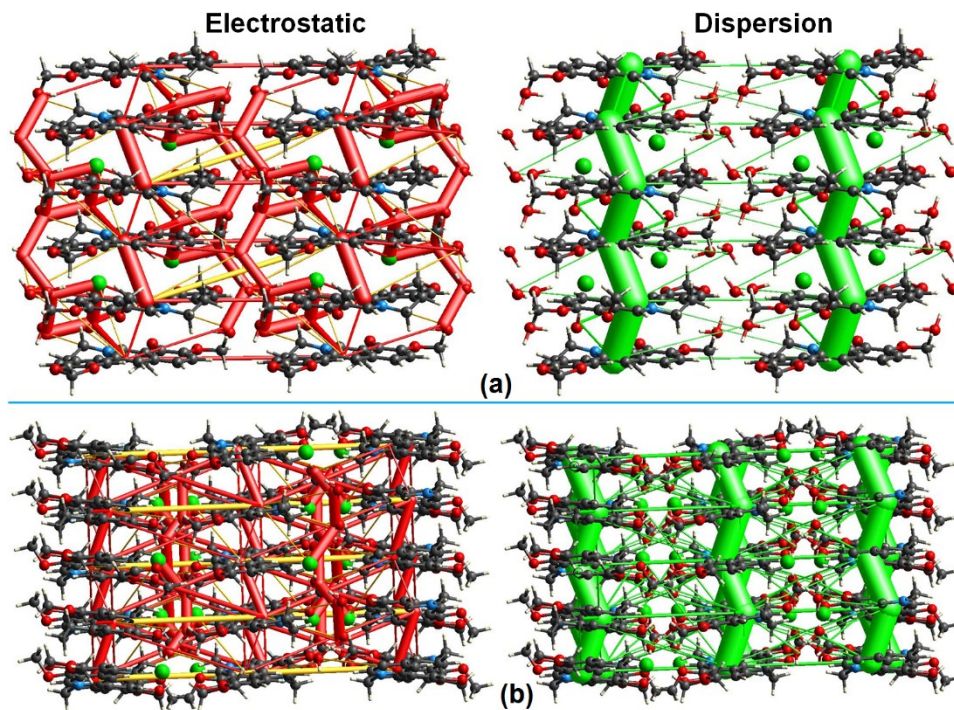

**Fig. S12** Energy frameworks corresponding to electrostatic (red) and dispersion (green) components for (a) BL-4H<sub>2</sub>O and (b) BL-2H<sub>2</sub>O phases.

#### References:

1. P. K.Mondal, V.Rao, S.Mittapalli and D. Chopra, *Cryst. Growth Des.*,2017,**17**, 1938.
2. APEX2, Version 2 User Manual, M86-E01078; Bruker Analytical X-ray Systems: Madison, WI, USA, 2006.
3. G. M.Sheldrick, SADABS; Bruker AXS: Madison, WI, USA, 2007.
4. G. M. Sheldrick, *ActaCrystallogr.*,2008,**A64**, 112.
5. G. M. Sheldrick, *ActaCrystallogr.*,2015,**A71**, 3.
6. L. J. Farrugia, *J. Appl. Crystallogr.* 1999,**32**, 837.
7. M. Nardelli, *J. Appl. Cryst.*, 1995, **28**, 659.
8. A. L. Spek, *ActaCryst.*, 2009, **D65**, 148-155.
9. C. F. Macrae, I. J.Bruno, J. A.Chisholm, P. R.Edgington, P.McCabe, E.Pidcock,

L.Rodriguez-Monge, R.Taylor, J. Van de Streek and P. A. Wood, *J. Appl. Crystallogr.*, 2008,**41**, 466. ([www.ccdc.cam.ac.uk/mercury](http://www.ccdc.cam.ac.uk/mercury)).

10. M. J.Turner, J. J. McKinnon, S. K.Wolff, D. J.Grimwood, P. R.Spackman, D.Jayatilaka and M. A.Spackman, *CrystalExplorer17*, 2017. University of Western Australia.  
*<http://hirshfeldsurface.net>*.
